# Supplementary material for: Health‐Related Quality of Life in MONARCH 3: Abemaciclib plus an Aromatase Inhibitor as Initial Therapy in HR+, HER2− Advanced Breast Cancer
Source: PubMed Central journal article supplement — Oncologist. 2020 Jun 24;25(9):e1346–54. doi: 10.1634/theoncologist.2020-0084 (PMC7485333; doi:10.1634/theoncologist.2020-0084), 2020-06-24
Supplement: ONCO-25-e1346-s002.pdf [file ONCO-25-e1346-s002.pdf]

Supplemental Tables for:  
Health-related quality of life in MONARCH 3: Abemaciclib plus an aromatase inhibitor as initial therapy in HR+, HER2-advanced breast cancer  
Gregory L. Price et al.

**Supplemental Table 1.** Detailed information on specific items of the EORTC QLQ-C30 and EORTC BR23.

| Functional or symptom scale             | Specific items asked about <sup>1</sup>                                |
|-----------------------------------------|------------------------------------------------------------------------|
| <b>EORTC QLQ-C30<sup>20</sup></b>       |                                                                        |
| <b>Global health status<sup>2</sup></b> | Rating of overall health                                               |
|                                         | Rating of overall quality of life                                      |
| <b>Functioning</b>                      |                                                                        |
| Cognitive <sup>2</sup>                  | Difficulty concentrating (i.e. reading, television show)               |
|                                         | Difficulty with memory                                                 |
| Emotional <sup>2</sup>                  | Feeling tense                                                          |
|                                         | Worrying                                                               |
|                                         | Irritability                                                           |
|                                         | Feeling depressed                                                      |
| Physical <sup>2</sup>                   | Difficulty completing strenuous activities (i.e. carrying a heavy bag) |
|                                         | Difficulty taking a long and/or a short walk.                          |
|                                         | Remaining in bed or in a chair all day.                                |
|                                         | Difficulty eating, dressing, washing, or toileting independently       |

|                                     |                                                                                |
|-------------------------------------|--------------------------------------------------------------------------------|
| Role <sup>2</sup>                   | Difficulty in completing work or daily activities                              |
|                                     | Limited in participating in hobbies or other leisure time activities           |
| Social <sup>2</sup>                 | Physical or medical condition interfering with family life                     |
|                                     | Physical or medical condition interfering with social activities               |
| <b>Symptoms</b>                     |                                                                                |
| Appetite loss <sup>2</sup>          | Lacking appetite                                                               |
| Constipation <sup>2</sup>           | Experienced constipation                                                       |
| Diarrhea <sup>2</sup>               | Experienced diarrhea                                                           |
| Dyspnea <sup>2</sup>                | Shortness of breath                                                            |
| Fatigue <sup>2</sup>                | Requiring rest                                                                 |
|                                     | Felt weak                                                                      |
|                                     | Felt tired                                                                     |
| Financial difficulties <sup>2</sup> | Physical condition or medical treatment contributing to financial difficulties |
| Insomnia <sup>2</sup>               | Difficulty sleeping                                                            |
| Nausea/vomiting <sup>2</sup>        | Felt nauseous                                                                  |
|                                     | Vomited                                                                        |
| Pain <sup>2</sup>                   | Experienced pain                                                               |
|                                     | Pain interfering with daily activities                                         |

|                                            |                                                                        |
|--------------------------------------------|------------------------------------------------------------------------|
| <b>EORTC BR23<sup>21</sup></b>             |                                                                        |
| <b>Functioning</b>                         |                                                                        |
| Body image <sup>2</sup>                    | Feeling physically less attractive as a result of disease or treatment |
|                                            | Feeling less feminine as a result of disease or treatment              |
|                                            | Difficulty looking at body naked                                       |
|                                            | Feeling dissatisfied with body                                         |
| Sexual functioning <sup>3</sup>            | Interest in sex                                                        |
|                                            | Amount of sexual activity                                              |
| Sexual enjoyment <sup>3</sup>              | If sexually active, ability to enjoy sex                               |
| Future perspective <sup>2</sup>            | Experiencing worry about future health                                 |
| <b>Symptoms</b>                            |                                                                        |
| Systemic therapy side effects <sup>2</sup> | Dry mouth                                                              |
|                                            | Hair loss                                                              |
|                                            | Feeling ill or well                                                    |
|                                            | Experiencing hot flushes                                               |
|                                            | Experiencing headaches                                                 |
| Breast symptoms <sup>2</sup>               | Experiencing pain in affected breast                                   |
|                                            | Swelling in affected breast                                            |
|                                            | Sensitivity in affected breast                                         |

|                                 |                                                               |
|---------------------------------|---------------------------------------------------------------|
|                                 | Skin problems in the affected breast (i.e. itchy, flaky, dry) |
| Arm symptoms <sup>2</sup>       | Pain in arm or shoulder                                       |
|                                 | Swelling in arm or hand                                       |
|                                 | Difficulty raising arm or moving arm side to side             |
| Upset by hair loss <sup>2</sup> | If patient has experienced hair loss, is that upsetting?      |

<sup>1</sup>Please note this is not the specific wording of items, but summarizes what activities, behaviors and symptoms are asked about.

<sup>2</sup>Time frame for these items was past week.

<sup>3</sup>Time frame for these items was past 4 weeks.

Abbreviations: EORTC QLQ-BR23, European Organization for Research and Treatment of Cancer Breast Cancer-Specific Quality-of-Life Questionnaire; EORTC QLQ-C30, European Organization for the Research and Treatment of Cancer, Quality-of-Life Questionnaire Core 30.

**Supplemental Table 2.** Patient compliance (%) for the EORTC QLQ-C30 and BR23 by study arm and visit.

| <b>Planned visit</b> | <b>Main reason if not compliant</b> | <b>Abemaciclib + NSAID<br/>n=327</b> | <b>Placebo + NSAID<br/>n=161</b> | <b>Abemaciclib + NSAID<br/>n=327</b> | <b>Placebo + NSAID<br/>n=161</b> |
|----------------------|-------------------------------------|--------------------------------------|----------------------------------|--------------------------------------|----------------------------------|
|                      |                                     | <b>QLQ-C30</b>                       |                                  | <b>BR23</b>                          |                                  |
| <b>Baseline</b>      |                                     | 96.9                                 | 98.1                             | 95.7                                 | 97.5                             |
|                      | Missing                             | 3.1                                  | 1.9                              | 4.3                                  | 2.5                              |
|                      | Other                               | 0                                    | 0                                | 0                                    | 0                                |
|                      | Study site failed to administer     | 0                                    | 0                                | 0                                    | 0                                |
|                      | Subject refusal                     | 0                                    | 0                                | 0                                    | 0                                |
| <b>Cycle 3</b>       |                                     | 98.3                                 | 98.6                             | 97.3                                 | 98.6                             |
|                      | Missing                             | 0                                    | 0                                | 0                                    | 0                                |
|                      | Other                               | 1.0                                  | 0.7                              | 1.7                                  | 1.4                              |
|                      | Study site failed to administer     | 0.3                                  | 0                                | 0.3                                  | 0                                |
|                      | Subject refusal                     | 0.3                                  | 0.7                              | 0.7                                  | 0                                |
| <b>Cycle 5</b>       |                                     | 97.0                                 | 97.6                             | 96.6                                 | 96.9                             |
|                      | Missing                             | 0                                    | 0.8                              | 0                                    | 0.8                              |
|                      | Other                               | 0.8                                  | 0.8                              | 1.1                                  | 0.8                              |
|                      | Study site failed to administer     | 1.5                                  | 0.8                              | 1.5                                  | 0.8                              |

|                 |                                 |      |      |      |      |
|-----------------|---------------------------------|------|------|------|------|
|                 | Subject refusal                 | 0.8  | 0    | 0.8  | 0.8  |
| <b>Cycle 7</b>  |                                 | 97.2 | 95.7 | 97.2 | 96.6 |
|                 | Missing                         | 0    | 0    | 0    | 0    |
|                 | Other                           | 0.8  | 0.9  | 0.8  | 1.7  |
|                 | Study site failed to administer | 0.8  | 3.4  | 1.2  | 0.9  |
|                 | Subject refusal                 | 1.2  | 0    | 0.8  | 0.9  |
| <b>Cycle 9</b>  |                                 | 96.9 | 97.2 | 96.5 | 96.3 |
|                 | Missing                         | 0    | 0    | 0    | 0    |
|                 | Other                           | 1.3  | 0    | 1.3  | 0.9  |
|                 | Study site failed to administer | 1.3  | 1.9  | 1.7  | 1.9  |
|                 | Subject refusal                 | 0.4  | 0.9  | 0.4  | 0.9  |
| <b>Cycle 11</b> |                                 | 94.5 | 96.9 | 94.5 | 95.9 |
|                 | Missing                         | 0    | 0    | 0    | 0    |
|                 | Other                           | 0.9  | 0    | 0.5  | 1.0  |
|                 | Study site failed to administer | 3.2  | 1.0  | 3.7  | 1.0  |
|                 | Subject refusal                 | 1.4  | 2.0  | 1.4  | 2.0  |
| <b>Cycle 13</b> |                                 | 94.1 | 95.4 | 95.1 | 95.4 |
|                 | Missing                         | 0    | 0    | 0    | 0    |

|                 |                                 |      |      |      |      |
|-----------------|---------------------------------|------|------|------|------|
|                 | Other                           | 1.5  | 1.1  | 1.0  | 1.1  |
|                 | Study site failed to administer | 3.0  | 1.1  | 2.5  | 1.1  |
|                 | Subject refusal                 | 1.5  | 1.1  | 1.5  | 2.3  |
| <b>Cycle 15</b> |                                 | 95.7 | 96.4 | 95.1 | 96.4 |
|                 | Missing                         | 0    | 0    | 0    | 0    |
|                 | Other                           | 2.7  | 1.2  | 2.7  | 1.2  |
|                 | Study site failed to administer | 1.1  | 1.2  | 1.6  | 1.2  |
|                 | Subject refusal                 | 0.5  | 1.2  | 0.5  | 1.2  |
| <b>Cycle 17</b> |                                 | 96.6 | 95.9 | 96.0 | 94.5 |
|                 | Missing                         | 0    | 0    | 0    | 0    |
|                 | Other                           | 1.1  | 2.7  | 1.1  | 4.1  |
|                 | Study site failed to administer | 1.1  | 0    | 1.7  | 0    |
|                 | Subject refusal                 | 1.1  | 1.4  | 1.1  | 1.4  |
| <b>Cycle 19</b> |                                 | 96.4 | 90.8 | 95.8 | 92.3 |
|                 | Missing                         | 0    | 0    | 0    | 0    |
|                 | Other                           | 1.2  | 4.6  | 1.3  | 3.1  |
|                 | Study site failed to administer | 1.8  | 3.1  | 0.6  | 1.5  |
|                 | Subject refusal                 | 0.6  | 1.5  | 0.6  | 0    |

|                                       |                                 |      |      |      |      |
|---------------------------------------|---------------------------------|------|------|------|------|
| <b>Cycle 22</b>                       |                                 | 88.0 | 81.0 | 88.0 | 81.0 |
|                                       | Missing                         | 0.7  | 0    | 0.7  | 0    |
|                                       | Other                           | 4.0  | 5.2  | 4.0  | 5.2  |
|                                       | Study site failed to administer | 4.7  | 10.3 | 4.7  | 10.3 |
|                                       | Subject refusal                 | 2.7  | 3.4  | 2.7  | 3.4  |
| <b>Cycle 25</b>                       |                                 | 94.9 | 92.2 | 94.1 | 94.1 |
|                                       | Missing                         | 0    | 0    | 0    | 0    |
|                                       | Other                           | 2.9  | 0    | 2.9  | 0    |
|                                       | Study site failed to administer | 2.2  | 5.9  | 2.2  | 5.9  |
|                                       | Subject refusal                 | 0    | 2.0  | 0.7  | 0    |
| <b>Post-discontinuation Follow-up</b> |                                 | 71.6 | 70.8 | 71.6 | 69.0 |
|                                       | Missing                         | 0    | 0    | 0    | 0    |
|                                       | Other                           | 8.5  | 10.6 | 8.5  | 12.4 |
|                                       | Study site failed to administer | 4.5  | 6.2  | 4.5  | 7.1  |
|                                       | Subject refusal                 | 15.3 | 12.4 | 15.3 | 11.5 |

Abbreviations: EORTC QLQ-BR23, European Organization for Research and Treatment of Cancer Breast Cancer-Specific Quality-of-Life Questionnaire; EORTC QLQ-C30, European Organization for the Research and Treatment of Cancer, Quality-of-Life Questionnaire Core 30; mBPI-sf, Modified Brief Pain Inventory—short form; n, number of patients.



\*For 1 person, the reason for not completing the BR23 was known to be translation not available, which is categorized as other in this table.
